# Supplementary material
Source: PubMed Central journal article supplement (PMC6439800)
Supplement: jamafacialplastsurg-21-125-s001.pdf [file jamafacialplastsurg-21-125-s001.pdf]

1 **PLAN OF THESIS**

2  
3  
4 **MICRONEEDLING VERSUS TOPICAL TAZAROTENE 0.1% GEL FOR THE**  
5 **TREATMENT OF ATROPHIC POST ACNE SCARRING - A RANDOMIZED**  
6 **CONTROLLED STUDY**

7  
8  
9 SUBMITTED IN PARTIAL FULFILLMENT OF THE DEGREE

10  
11 OF

12 **MD (DERMATOLOGY, VENEREOLOGY AND LEPROLOGY)**

13  
14 OF THE

15  
16  
17 POST-GRADUATE INSTITUTE OF MEDICAL EDUCATION AND RESEARCH  
18 CHANDIGARH

19  
20 BY

21  
22 **DR.AFRA T P**

23  
24 JUNIOR RESIDENT

25 DEPARTMENT OF DERMATOLOGY, VENEREOLOGY AND LEPROLOGY  
26 PGIMER, CHANDIGARH

27  
28  
29  
30  
31 **GUIDE:**

32  
33 **DR TARUN NARANG**

34 ASSISTANT PROFESSOR

35 DEPARTMENT OF DERMATOLOGY, VENEREOLOGY AND LEPROLOGY  
36 PGIMER, CHANDIGARH

37  
38  
39  
40 **CO-GUIDE:**

41  
42 **DR SUNIL DOGRA**

43 ADDITIONAL PROFESSOR

44 DEPARTMENT OF DERMATOLOGY, VENEREOLOGY AND LEPROLOGY  
45 PGIMER, CHANDIGARH  
46

47  
48  
49  
50  
51  
52

## INDEX

|                                        |       |
|----------------------------------------|-------|
| Summary of the Proposed Research       | 3-4   |
| Review of Literature                   | 5-24  |
| Aims and Objectives                    | 25    |
| Materials and Methods                  | 26-33 |
| Statistical analysis                   | 34    |
| Ethical Justification                  | 35    |
| Bibliography                           | 36-42 |
| Annexure I Consent form                | 43    |
| Annexure II Study Proforma             | 44-46 |
| Annexure III Patient Information Sheet | 47-51 |

53  
54  
55  
56  
57  
58  
  
59  
60  
61  
62  
63  
64  
65  
66  
67

## SUMMARY OF THE PROPOSED RESEARCH

68

69

70 Acne vulgaris is a chronic inflammatory disease of the pilosebaceous unit. It manifests clinically  
71 as non-inflammatory (open and closed comedones) or inflammatory (papules, pustules and  
72 nodules) lesions. The major brunt of the disease is borne by adolescents aging 16-20 years as  
73 shown by a study in India<sup>1</sup>. Scarring as a sequel to acne can occur in up to 95% of acne patients  
74 and 30% may develop cosmetically disfiguring scarring.<sup>2</sup>

75 Various factors have a role in the causation of acne. The major ones are increased sebum  
76 production, hypercornification of pilosebaceous duct, abnormal colonization of pilosebaceous  
77 unit by *Propionibacterium acnes* and inflammation. The uninhibited inflammatory process in  
78 acne initiate the process of wound healing with the granulation tissue formation and remodeling  
79 of extracellular matrix.<sup>3</sup> Depending on the activity and balance between the components  
80 involved in the process, there can be a net loss or gain of collagen forming atrophic or  
81 hypertrophic scars respectively.<sup>4</sup> Thus the inflammatory process associated with acne lead to post  
82 acne scarring.

83 Jacob et al classified atrophic acne scars as icepick (60%–70% ), rolling(15%–25%) and boxcar  
84 (20%–30%) depending on their shape.<sup>5</sup> For the ease of identification and stratification of  
85 severity, atrophic acne scars are graded by different scales, of which the most popular ones are  
86 the qualitative scale and the quantitative scale proposed by Goodman and Baron.<sup>6,7</sup>

87 Eventhough acne scarring is permanent, the appearance can be improved with various medical,  
88 laser, surgical and tissue augmentation techniques. Topical retinoids are the mainstay of medical  
89 management for macular post acne scars. They reduce epidermal melanin by inhibiting the action  
90 of tyrosinase and and also by reduction of melanosome transfer to keratinocytes. Retinoids also  
91 normalizes keratinocyte differentiation, reduces the inflammation and stimulates collagen  
92 synthesis.<sup>8, 9</sup> Topical tazarotene is therapeutically effective as 0.1% gel or 0.1% cream.<sup>10,</sup>  
93 <sup>11</sup>Tazarotene (0.1%) gel was found to be superior to adapalene (0.1%) and tretinoin (0.025%,  
94 0.1%) for the treatment of acne vulgaris.<sup>12</sup> Based on its mechanism of action and role in collagen

95 synthesis, topical tazarotene is a logical choice to investigate for the management of atrophic  
96 post acne scars.

97 Among the procedural methods, microneedling with dermaroller is a novel and promising  
98 option. It is a minimally invasive procedure for the management of atrophic acne scars.<sup>13</sup> It  
99 causes per-cutaneous collagen induction by augmenting the natural process of wound healing.<sup>14</sup>  
100 There are studies establishing the efficacy of newer dermatosurgical technique, the  
101 microneedling in atrophic post acne scar management.<sup>15, 16</sup> The efficacy of topical tazarotene in  
102 the management of acne vulgaris and reducing PIH has been proved in previous published  
103 studies.<sup>12, 17</sup> This is a pilot study comparing microneedling and topical tazarotene for the  
104 treatment of atrophic post acne scarring in regard to extent and rapidity of improvement, patient  
105 satisfaction and any adverse events if any.

106

107

108

109

110

111

112

113

114

115

116

117

118

119

120

## 121 **Introduction**

122 Acne vulgaris is one of the most common dermatoses in the world. It is a chronic inflammatory  
123 disease of the pilosebaceous unit. Majority of the incidence of acne is seen in adolescence. Acne  
124 occurs over the seborrheic areas like face and trunk. It may manifest clinically as non  
125 inflammatory (open and closed comedones) or inflammatory (papules, pustules and nodules)  
126 lesions. The inflammatory process associated with acne may lead to post acne scarring and is  
127 common sequelae. Scarring occurs due to gain or loss of collagen with resultant formation of  
128 hypertrophic or atrophic scarring respectively. Scarring is a distressing phenomenon and is most  
129 unwelcome when it occurs on the face. Severe scarring on the face is physically disfiguring and  
130 causes significant psychological distress. The affected individual may suffer from lack of self  
131 confidence, low self-esteem and many other psychological ill effects. Even though post acne  
132 facial scarring is a challenging problem to manage there are various methods to improve the  
133 appearance of scar.

## 134 **Epidemiology**

135 Acne is an almost universal condition in younger people. Acne usually starts in the early teens  
136 near puberty with the onset of facial sebum production and facial comedones followed by  
137 inflammatory lesions. Acne lesions usually develop earlier in females as puberty occurs earlier in  
138 them. The major brunt of the disease is borne by the age group 16-20 years as shown by a study  
139 in India.<sup>1</sup> Mean age of onset was 15.97 years, affecting males more than females. Prevalence of  
140 acne in age group of 12-17 years is 50-60% in boys and 38-73% in girls by a study in India.<sup>1</sup>  
141 Scarring as a sequel to acne can occur in up to 95% of acne patients and 30% may develop  
142 cosmetically disfiguring scarring.<sup>2</sup>

## 143 **Pathogenesis**

### 144 **Pathogenesis of Acne**

145 Acne is a multifactorial disease. The four basic factors which have been identified include: (i)  
146 sebaceous gland hyperactivity and seborrhea (ii) abnormal follicular differentiation and

147 hyperkeratinization of the pilosebaceous duct, (iii) abnormal colonization of the pilosebaceous  
148 duct with microbial flora especially *P. acnes* and (iv) increased inflammation.

### 149 **1. Sebaceous gland hyperactivity and seborrhea:**

150 Increased production of sebum by sebaceous glands leads to development of acne.<sup>18</sup>  
151 Triglycerides and lipoperoxides in sebum have an active role in acne formation. Free fatty acids  
152 formed by the breakdown of triglycerides promote colonization of *P.acnes*, cause inflammation  
153 and is comedogenic.<sup>19</sup> Lipoperoxides produce proinflammatory cytokines and stimulate the  
154 peroxisome proliferator-activated receptor (PPAR) pathway, increasing sebum production.<sup>20</sup>  
155 Androgenic hormones such as testosterone and more active DHT also have a significant role in  
156 acne pathogenesis. These hormones act on the sebocytes and regulate their proliferation and  
157 differentiation.<sup>21</sup> Corticotropin releasing hormone also has a role and it is seen that corticotropin  
158 releasing hormone receptors are increased in the sebocytes of patients with acne.<sup>22</sup>

### 159 **2. Comedogenesis :**

160 Follicular epidermis including that of the infundibulum becomes hyperproliferative and the  
161 corneocytes become increasingly cohesive with the formation of a plug in the follicular ostium.  
162 The plug so formed further causes collection of keratin, sebum and bacteria in the follicle and  
163 dilation of the upper hair follicle producing a microcomedone.

164 Keratinocyte hyperproliferation is stimulated by DHT, subnormal levels of linoleic acid,  
165 increased interleukin 1 alpha (IL-1) activity and effects of *P.acnes*.<sup>23, 24</sup> Fibroblast growth factor  
166 receptor (FGFR)- 2 pathway also causes proliferation of corneocytes and is androgen  
167 dependent.<sup>25</sup>

168 Ductal hyperkeratinisation is seen histologically as microcomedones and clinically as  
169 blackheads, whiteheads and other forms of comedones such as macrocomedones .The number  
170 and size of follicular casts (micro-comedones) correlates with acne severity.<sup>26</sup>

### 171 **3. Colonization of Intrafollicular duct with *P.acnes* :**

172 *P.acnes* is a Gram-positive, anaerobic, and microaerobic bacterium found in the pilosebaceous  
173 follicle. Colonization of intrafollicular duct with *P.acnes* has significant role in comedogenesis  
174 and initiating inflammation. The breakdown of triglycerides into free fatty acids by *P.acnes*

175 further promotes its colonization resulting in comedogenesis .<sup>19</sup>The carbohydrate antigen present  
176 in the cell wall of *P.acnes* causes antibody development whose titres correlates with severity of  
177 acne.<sup>27</sup>

#### 178 **4. Inflammation:**

179 The microcomedone formed by follicular plugging further expand by accumulation of keratin,  
180 sebum, and bacteria and eventually result in follicular wall rupture and extrusion of its material  
181 into the dermis. This will elicit inflammation with lymphocyte being the predominant cell type in  
182 the initial 24 hours followed by neutrophils.<sup>28</sup> It has been proved by various studies that  
183 inflammatory process starts even before comedo formation and is further increased by comedo  
184 formation.<sup>29</sup>

185 The antiproionobacterium antibody activates the complement system and initiates  
186 proinflammatory responses.<sup>30</sup> Elicitation of the delayed type hypersensitivity response and the  
187 production of lipases, proteases, hyaluronidases and chemotactic factors by *P.acnes* also promote  
188 inflammation.<sup>31</sup> Neutrophils release reactive oxygen species and lysosomal enzymes and adds to  
189 the severity of inflammation.<sup>32</sup> Moreover, *P.acnes* also binds to the toll-like receptor 2 (TLR2)  
190 on monocytes and neutrophils and stimulate the release of proinflammatory cytokines such as  
191 IL-1 $\alpha$ , IL-8, IL-12, and TNF- $\alpha$  around the sebaceous follicle.<sup>33, 34</sup>

#### 192 **Pathogenesis of Acne Scarring**

193 The uninhibited inflammatory process in acne leads to rupture of the follicular wall, marked  
194 perifollicular inflammation and abscess formation. All these events stimulate the wound healing  
195 process. Biological process involved in wound healing is a complex one and involves cellular  
196 components such as keratinocytes, fibroblasts, endothelial cells, nerve cells, inflammatory cells  
197 like lymphocytes, monocytes, and neutrophils, soluble chemical mediators, and extracellular  
198 matrix components. Three major events involved in the wound healing process are: (a)  
199 inflammation (b) formation of granulation tissue and (c) remodeling of matrix.<sup>3</sup>

200 **a. Inflammation.** Postacne erythema and hyperpigmentation develop as a result of following  
201 processes: initial blanching due to vasoconstriction, followed by vasodilatation and resultant  
202 erythema that stimulate melanogenesis. Inflammatory mediators released by granulocytes,

203 macrophages, neutrophils, lymphocytes, fibroblasts, and platelets initiate granulation tissue  
204 formation.<sup>35</sup> Histopathological study of acne scars by Holland et al. demonstrated a direct  
205 relationship between severity and duration of inflammation at the pilosebaceous unit and acne  
206 scarring. There by suggesting that treating early inflammation in acne may be the best approach  
207 to prevent scarring.<sup>36</sup>

208 **b. Granulation Tissue Formation.** Tissues that are damaged during the inflammatory process  
209 are repaired and new capillaries are formed. Neutrophils which are present during the initial  
210 stages are replaced by monocytes that eventually form macrophages and release various growth  
211 factors including platelet-derived growth factor, fibroblast growth factor, and transforming  
212 growth factors  $\alpha$  and  $\beta$ . These chemical mediators stimulate the migration and proliferation of  
213 fibroblasts.<sup>37</sup> Fibroblasts produce collagen. The new skin formed is predominantly composed of  
214 type III collagen; and type I collagen occupies about one fifth of it. As the scar matures the  
215 proportion of collagen types changes and becomes similar to that of unwounded skin with 80%  
216 of collagen formed by type 1.<sup>38</sup>

217 **c. Matrix Remodelling.** Architecture of the extracellular matrix is maintained by the enzymes  
218 produced by the fibroblasts and keratinocytes. These enzymes, matrix metalloproteinases  
219 (MMPs) which degrade the extracellular matrix (ECM) and tissue inhibitors of MMPs (TIMP)  
220 act together and remodel ECM.<sup>39</sup> Any imbalance in the ratio of MMPs and TIMP can result in  
221 decreased or increased deposition of collagen and formation of an atrophic or hypertrophic scar  
222 respectively.<sup>4</sup>

### 223 **Morphology and Classification**

224 During the process of healing of active acne and matrix remodeling there can be a net loss or  
225 gain of collagen forming atrophic or hypertrophic scars. Atrophic scars associated with a loss of  
226 collagen are the major type of acne scar whereas hypertrophic scars and keloids form around  
227 only ten percent of acne scar.

### 228 **Atrophic Scars<sup>40</sup>**

229 Atrophic scars are further subclassified into ice pick, boxcar, and rolling scars.

230 Depending on the shape, 3 primary atrophic acne scars as described by Jacob et al:<sup>5</sup>



231 Icepick 60%–70% “V” shape

232 Rolling 15%–25% “M” shape

233 Boxcar 20%–30% “U” shape

234 This new classification system relates scar anatomy with the available effective treatment  
235 options, facilitating precise identity and classification of acne scar types

236 **Icepick scars:** Scars those are narrow (<2 mm), deep, sharply marginated epithelial tracts that  
237 extend vertically to the deep dermis or subcutaneous tissue are known as icepick scars. In this  
238 type of scars, the surface opening is typically wider than the deeper infundibulum (forming a  
239 “V” shape), and the scar tapers as it goes deeper (Fig 1).

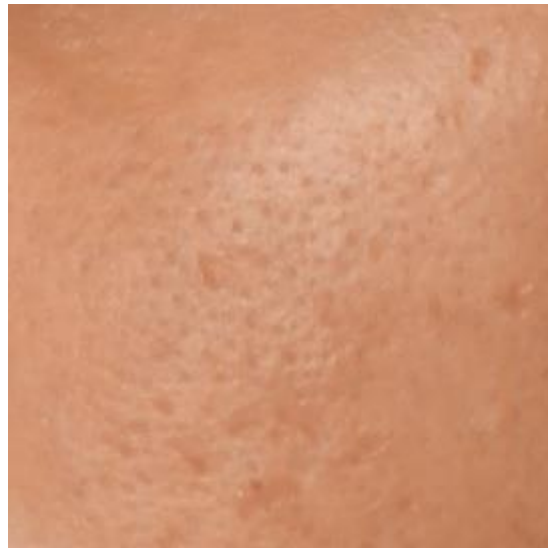

240

241 Figure 1: Icepick scars

242 **Rolling scars:** Scars forming as a result of dermal tethering of the dermis to the subcutis of  
243 otherwise relatively normal appearing skin characterizes rolling scars, and is usually wider than 4  
244 to 5 mm. This abnormal fibrous anchoring leads to superficial shadowing and a rolling or  
245 undulating appearance to the overlying skin (“M” shape) (Fig 2).

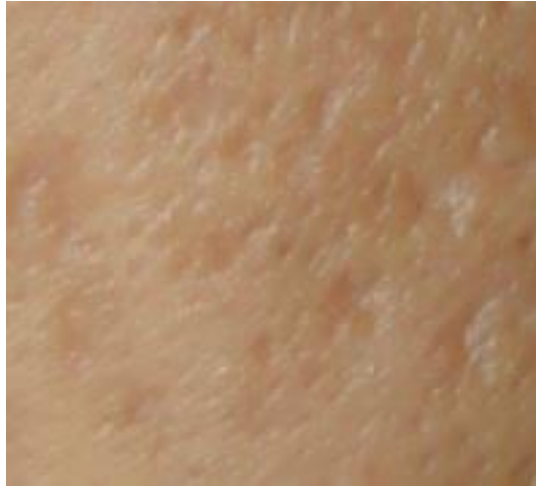

246

247

Figure 2: Rolling scars

248 **Boxcar scars:** Round or oval depressions with well defined vertical edges are known as boxcar  
249 scars. These scars do not taper towards the base and are wider at the surface than icepick scars.  
250 These scars are “U” shaped with a wide base. Boxcar scars may be shallow (0.1-0.5mm) or deep  
251 ( $\geq 0.5\text{mm}$ ) and are most often 1.5 to 4 mm in diameter (Fig 3).

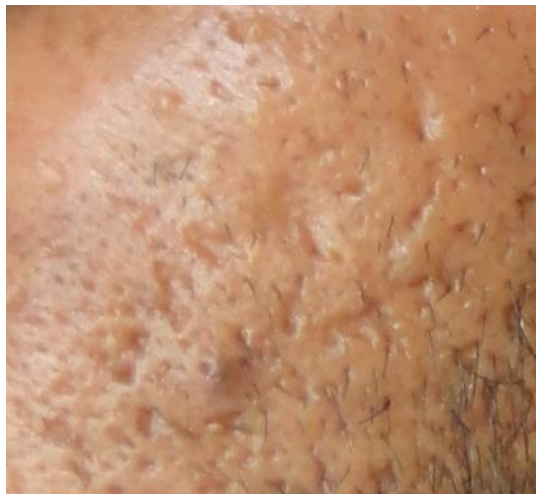

252

253

Figure 3: Boxcar scars

#### 254 **Hypertrophic and Keloidal Scars<sup>40</sup>**

255 Increased collagen deposition and decreased collagenase activity during the process of healing in  
256 inflammatory acne results in either hypertrophic or keloidal scar. Pink, firm and elevated scars,  
257 that do not extend beyond the margins of the initial site of injury are hypertrophic scars and is

258 formed due to the deposition of bundles of thick hyalinized collagen within the borders of  
259 original injury . Hypertrophic scars have similar pathology to that of other dermal scars. Whereas  
260 scars that appear as reddish-purple papules and nodules which extend outside the borders of the  
261 original wound are keloids; and is formed due to the deposition of thick bundles of hyalinized  
262 acellular collagen in a whorled pattern. Darker-skinned individuals are more prone to develop  
263 hypertrophic and keloidal scars (Fig 4).

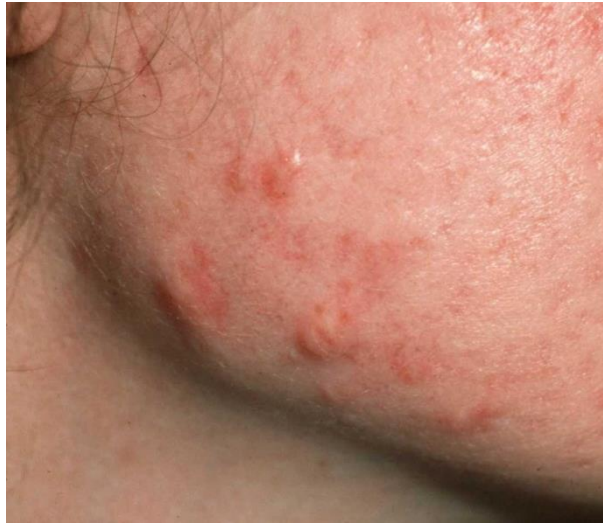

264

265

Figure 4: Keloidal scars

### 266 **Grading of Acne Scars**

267 Atrophic scars of various types can be present in the same individual and it becomes very  
268 challenging to identify them separately. To overcome this difficulty several classifications and  
269 scales have been proposed by other authors. The qualitative scale and the quantitative scale  
270 proposed by Goodman and Baron<sup>6, 7</sup> and the ECCA scale (Echelle d'Evaluation Clinique des  
271 Cicatrices d'Acné) by Dreno et al<sup>41</sup> are the most widely used scales.

272 The qualitative scarring grading system proposed by Goodman and Baron is simple and  
273 universally applicable and reproducible.<sup>6</sup> Depending on the severity, an acne scar is graded into  
274 four different grades according to this classification as shown in Table 1.

275

276

277 **Table 1 --- Goodman and Baron Qualitative Scarring Grading System<sup>6</sup>**

| Grades of Post acne Scarring | Level of Disease | Clinical features                                                                                                                                                                                                                                            |
|------------------------------|------------------|--------------------------------------------------------------------------------------------------------------------------------------------------------------------------------------------------------------------------------------------------------------|
| 1                            | Macular          | Erythematous, hyper/hypo pigmented flat marks. No contour changes.                                                                                                                                                                                           |
| 2                            | Mild             | Mild atrophy or hypertrophy scars that may not be obvious at social distances of 50 cm or greater and may be covered adequately by make up or the normal shadow of hairs.                                                                                    |
| 3                            | Moderate         | Moderate atrophic or hypertrophic scarring that is obvious at social distances of 50 cm or greater and is not covered adequately by make up or the normal shadow of hairs; but is still able to be flattened by manual stretching of the skin (if atrophic). |
| 4                            | Severe           | Severe atrophic or hypertrophic scarring that is evident at social distances greater than 50 cm and is not covered easily by make up or the normal shadow of the hairs; and is not able to be flattened by manual stretching of the skin.                    |

278

279 Acne scars of milder types can be easily assigned a grade. But in severe post acne scarring, scars  
 280 of different grades and severity may be present in the same individual making the task of  
 281 assigning a qualitative grade according to Goodman and Baron a difficult one. Goodman and  
 282 Baron has also proposed a quantitative global acne scarring assessment tool (Table 2) which  
 283 takes into account not only the type of scars but also the number of each type of scar.<sup>7</sup>

284

285

286

287

288

289

290 **Table 2 Goodmans Quantitative Global Acne Scarring Grading System<sup>7</sup>**

291

| <b>Grade or Type</b>                                                                                                                                                                                                                        | <b>Number of Lesions<br/>1 (1-10)</b> | <b>Number of Lesions<br/>2 (11-20)</b> | <b>Number of Lesions<br/>3(&gt;20)</b> |
|---------------------------------------------------------------------------------------------------------------------------------------------------------------------------------------------------------------------------------------------|---------------------------------------|----------------------------------------|----------------------------------------|
| <b>A) Milder scarring (1 point each)</b><br>Macular erythematous pigmented<br>Mildly atrophic, dish like                                                                                                                                    | 1                                     | 2                                      | 3                                      |
| <b>B) Moderate scarring (2 points each)</b><br>Moderately atrophic, dish like<br>Punched out with shallow bases small scars (<5mm)                                                                                                          | 2                                     | 4                                      | 6                                      |
| <b>C) Severe scarring (3 points each)</b><br>Punched out with deep but normal bases, small scars (<5mm)<br>Punched out with deep but abnormal bases, small scars (<5mm)<br>Linear or troughed dermal scarring<br>Deep, broad atrophic areas | 3                                     | 6                                      | 9                                      |
| <b>D) Hyperplastic</b><br>Papular scars<br>Keloidal/Hypertrophic scars                                                                                                                                                                      | 2 (Area <5mm)<br>6                    | 4 (Area 5-20 cm <sup>2</sup> )<br>12   | 6 (Area >20 cm <sup>2</sup> )<br>18    |

292

293 This allows more accurate assessment of acne scarring severity which can be reproduced with  
 294 considerable accuracy and can be used for the evaluation of the efficacy of any therapeutic  
 295 intervention. According to this system fewer points are assigned to macular and mild atrophic  
 296 scars than to moderate and severe atrophic scars (macular or mildly atrophic: 1 point; moderately  
 297 atrophic: 2 points; punched out or linear-troughed severe scars: 3 points; hyperplastic, papular  
 298 scars: 4 points). The numerical value obtained on the basis of scar type is then multiplied by the  
 299 multiplication factor based on the number of each type of lesion whereby, for 1-10 scars, the  
 300 multiplier is 1; for 11–20 it is 2; for more than 20 it is 3.

301 The ECCA (Echelle d'Evaluation clinique des Cicatrices d'acné) for facial acne scarring is also a  
302 quantitative scale. This grading system takes into consideration the type and number of  
303 individual scar. Each scar type is assigned a weighing factor depending on the disfigurement that  
304 it causes and scar types that are more disfiguring are given a higher weighing factor. Specific  
305 scar types and their associated weighting factors are the following: atrophic scars with diameter  
306 less than 2 mm: 15; U-shaped atrophic scars with a diameter of 2–4 mm: 20; M-shaped atrophic  
307 scars with diameter greater than 4 mm: 25; superficial elastolysis: 30; hypertrophic scars with a  
308 less than 2-year duration: 40; hypertrophic scars of greater than 2-year duration: 50. A  
309 semiquantitative assessment of the number of each of these scar types was then determined with  
310 a four-point scale, in which 0 indicates no scars, 1 indicates less than five scars, 2 indicates  
311 between five and 20 scars, and 3 indicates more than 20 scars.. The total score can vary from 0 to  
312 540. The relative severity of scarring caused by each scar type can be estimated by this method.  
313 In recent studies on the reliability of this scale, seven dermatologists underwent a 30-min  
314 training session prior to the evaluation of ten acne patients. There was no statistical difference in  
315 score grading between participating dermatologists. The global scores, however, varied from a  
316 minimum of 15 to a maximum of 145. Unfortunately, a statistical estimate of reliability within  
317 and between raters was not provided. The potential advantages of this system include  
318 independent accounting of specific scar types, thereby providing for separate atrophic and  
319 hypertrophic subscores in addition to total scores. Potential shortcomings include restriction to  
320 facial involvement, time intensity, and undetermined clinical relevance of score ranges.<sup>41</sup>

## 321 **Treatment**<sup>42-54</sup>

322 Acne scarring is permanent; however, the appearance can be improved with various medical,  
323 laser, and surgical approaches.

324 Treatment of acne scars can be broadly classified as:

- 325 1. Medical Management
- 326 2. Surgical and Procedural Management
- 327 3. Tissue augmentation
- 328 4. Light , laser and energy Therapy

329 **Medical Management:** It includes retinoids, topical/intralesional steroids, silicone dressing, and  
330 various other topical and injectable substances. Hypertrophic scars, keloids, and pigmentary  
331 changes are the usual focus of medical management.

332 **Surgical Management:**

- 333 1) Punch Excision
- 334 2) Elliptical excision
- 335 3) Punch Elevation
- 336 4) Skin graft
- 337 5) Subcision
- 338 6) Debulking

339 **Procedural Management**

- 340 1) Cryosurgery
- 341 2) Electrodesiccation
- 342 3) Radiation treatment
- 343 4) Chemical peels
- 344 5) Microdermabrasion
- 345 6) Dermabrasion
- 346 7) Microneedling

347 **Tissue Augmentation:** Scars may be filled with collagen injections, artificial dermal fillers, or  
348 autologous fat transfer.

349 **For Atrophic scars:**<sup>40</sup> Chemical peels, dermabrasion/microdermabrasion, laser treatment like  
350 Carbon dioxide laser, Erbium YAG laser, NdYAG, Diode lasers, punch techniques, subcision,  
351 dermal grafting, tissue augmentation agents such as fat transplantation, hyaluronic acid, skin  
352 needling, combined therapy.

353 **For Hypertrophic scars:**<sup>40</sup> Silicone gel, cryotherapy, intralesional steroid therapy, pulsed  
354 dye laser, surgery. Other treatment options for hypertrophic acne scars and keloids that can be  
355 taken into account includes elastic compression, intralesional injection of 5-fluorouracil,  
356 imiquimod, interferon, radiotherapy, and bleomycin.

357 Some of these methods like lasers are very costly and out of reach of an average  
358 patient while others are either invasive or not so efficacious. So there is always a need for  
359 development of relatively affordable, efficacious and less invasive methods.

### 360 **Topical Retinoids and Tazarotene**

361 Topical retinoids is a mainstay of acne treatment because it is effective against both acne and  
362 post acne scarring. The broad anti-acne activity and safety profile of topical retinoid justifies  
363 their use as first-line treatment in most types of non-inflammatory and inflammatory acne.<sup>55</sup>  
364 Retinoids are synthetic derivatives of retinol (vitamin A). Tretinoin (all-trans retinoic acid),  
365 isotretinoin (13-cis retinoic acid), adapalene (derived from naphthoic acid) and tazarotene  
366 (acetylenic retinoid) are the retinoids that are used in the topical preparation.<sup>56</sup> The tazarotene is  
367 a new third generation topical acetylenic retinoid. Tazarotene was approved by the US-FDA in  
368 June 1997 for acne vulgaris.<sup>57</sup> Topical tazarotene is therapeutically effective as 0.1% gel or 0.1%  
369 cream.<sup>10, 11</sup> Tazarotene (0.1%) was found to be superior to adapalene (0.1% gel) and tretinoin  
370 (0.025%, 0.1%) for the treatment of acne vulgaris.<sup>12</sup>

371 In 1975, tretinoin along with hydroquinone and dexamethasone was first reported to have  
372 efficacy in reducing PIH.<sup>58</sup> In further studies, tretinoin was used as monotherapy and in  
373 combination with hydroquinone and either lactic acid or glycolic acid.<sup>59-61</sup> More recently,  
374 adapalene monotherapy was also reported to be effective, though only in a trial without a placebo  
375 comparison group.<sup>62</sup> Tazarotene previously has shown efficacy in reducing PIH associated with  
376 pseudofolliculitis barbae, as well as in reducing hyperpigmentation associated with  
377 photodamage, epidermal nevi, and acanthosis nigricans.<sup>17, 63</sup> Because tazarotene also is a well-  
378 established treatment for acne vulgaris, and has shown antiacne efficacy without the induction of  
379 PIH in patients from darker racial ethnic groups, tazarotene is a logical choice to investigate for  
380 the treatment of PIH in darker-skinned patient.<sup>10</sup> In studies on photodamaged skin, tazarotene has  
381 been shown to be effective in the reduction of mottled hyperpigmentation and fine wrinkling,



382 with significant improvements noted more rapidly for mottled hyperpigmentation (week 12)  
383 than fine wrinkling (week 24).<sup>17, 63</sup> Intreating PIH with tretinoin monotherapy, a significant  
384 advantage of tretinoin over vehicle was first reported at week 12.<sup>59</sup> Thus, it is possible that  
385 tazarotene may act slightly more rapidly than tretinoin.

### 386 **Mode of Action of Topical Retinoids and Tazarotene**

387 Retinoids act by binding to the nuclear hormone receptors retinoic acid receptors (RARs) and  
388 retinoid X receptors (RXRs) and cytosolic binding proteins receptor family and causes  
389 transcription of retinoic acid-responsive genes.<sup>64</sup> There are three subtypes ( $\alpha$ ,  $\beta$ ,  $\gamma$ ) in each  
390 receptor family and they form homo and heterodimers and then bind to a DNA stretch called a  
391 'responsive element' (RARE and RXRE) and induce the expression or downregulation of target  
392 genes in a ligand-dependent manner. RAR $\gamma$  and RXR $\alpha$  are the most common subtypes of  
393 retinoid receptors in human skin.<sup>65, 66</sup> Tazarotene is selective for the beta and gamma subtypes of  
394 retinoic acid receptors.

395 Retinoids reduce hyperpigmentation of the skin by reducing epidermal melanin by inhibition of  
396 tyrosinase and tyrosinase-related protein 1 (TRP-1) activity, reduction of melanosome transfer  
397 from melanocytes to keratinocytes and increasing the turnover of melanin-laden keratinocytes.

### 398 **Biologic effects**

399 Retinoids normalize keratinocyte differentiation and reduces proliferation thereby increasing  
400 follicular epithelial turnover and the shedding of corneocytes.<sup>8</sup> As a result mature comedones are  
401 expelled and further formation of microcomedone is suppressed.<sup>67</sup> This prevention of  
402 hypercornification of pilosebaceous follicle decreases the colonization by *P.acne*. The expression  
403 of the transcription factors, such as AP-1, are also regulated by retinoids.<sup>68</sup> In effect, the genetic  
404 expression of growth factors such as vascular endothelial growth factor and degradative enzymes  
405 such as matrix metalloproteases which are involved in inflammatory responses are modified. It  
406 also reduces the expression of inflammatory markers. Furthermore, collagen synthesis is  
407 stimulated and oxidative stress is prevented by retinoids and thereby exerts an anti-aging effect.<sup>9,</sup>  
408 <sup>56</sup> Various studies have also demonstrated a direct immunomodulatory activity for topical  
409 retinoids.<sup>69, 70</sup>

## 410 **Safety and Tolerability**

411 Tazarotene has a low potential for systemic adverse effects following topical application as only  
412 less than 6% of the applied drug is absorbed into plasma.<sup>71</sup> It is then rapidly metabolized into  
413 hydrophilic metabolites such as tazarotenic acid which are eliminated from the blood in the urine  
414 and feces.<sup>72</sup> There is no systemic accumulation of the drug. Once-daily application leads to better  
415 patient compliance. The selectivity of tazarotene for the beta and gamma subtypes of retinoic  
416 acid receptors minimizes the risk of adverse effects. Local adverse effects of tazarotene are  
417 similar to those observed with other topical retinoids and include erythema, burning/stinging,  
418 itching, and dryness.<sup>55</sup> The irritative potential of tazarotene can be reduced by short-contact  
419 therapy once or twice daily or by use of an every other day regimen.<sup>73</sup> It can also be used as short  
420 contact therapy where application, after an initial contact period of 2 minutes, is increased in 1-  
421 minute increments, at intervals of at least 3 days, to a maximum of 5 minutes. The contact period  
422 is reduced to 30 seconds if there is peeling, erythema, dryness, burning, or itching; the contact  
423 period is then increased in 30-second intervals every 3 days, if tolerated, to a maximum of 5  
424 minutes.<sup>73</sup> The cream is generally better tolerated than the gel.<sup>74</sup> The severity of skin irritation  
425 caused by tazarotene is usually mild and improves with time.<sup>12</sup>

426 Tazarotene is designated pregnancy category X, prohibiting its use during pregnancy and  
427 breastfeeding. Women of reproductive age group should use adequate birth-control measures  
428 when topical tazarotene is being used. Teratogenicity was reported in animals after oral  
429 administration of high doses of tazarotene but not after topical use.<sup>75</sup>

430

## 431 **Microneedling**

432 Microneedling with dermaroller is a novel, minimally invasive therapeutic method for the  
433 management of scars, particularly acne scars.<sup>13</sup> Percutaneous collagen deposition by “Scar  
434 needling” using subcision was first developed by Orentreich and Orentreich in 1995.<sup>42</sup>

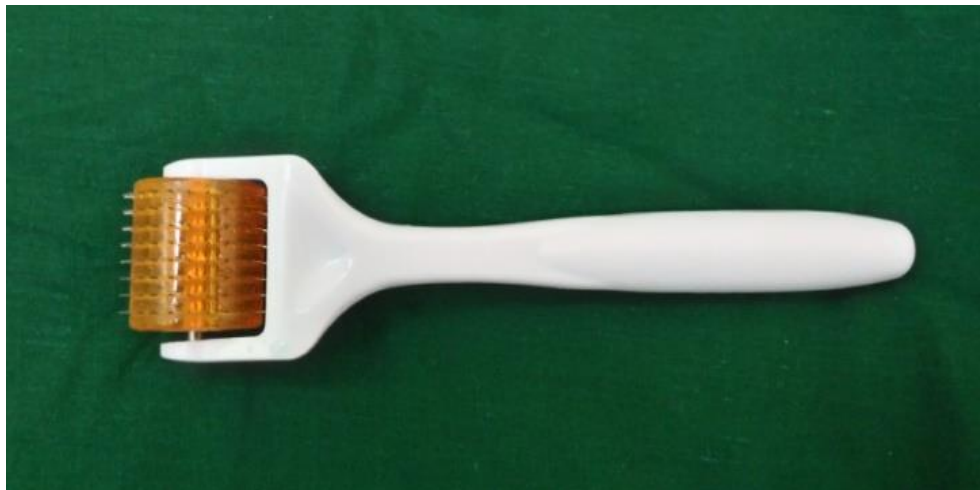

435

436

Figure 5: Dermaroller device

437 Dermaroller as a method of percutaneous collagen induction was described by Fernandez in  
 438 2006.<sup>14</sup> The principle behind the technique is that the damaged collagen bundles in the upper  
 439 layer of the dermis that causes scars are broken down by puncturing the skin with small needles  
 440 multiple times resulting in the formation of new collagen immediately beneath the epidermis.<sup>15,</sup>  
 441 <sup>42</sup>192 fine microneedles arranged in eight rows on a drum shaped roller is the standard  
 442 dermaroller used for acne scars (Fig 5). The diameter of the microneedle is 0.1 mm and the  
 443 length may vary (0.5–2.5 mm).<sup>16</sup> When the scarred skin is rolled with dermaroller multiple times  
 444 in various directions, micro wounds are formed in the papillary dermis. Rolling with these  
 445 microneedles, in various directions, lead to microtrauma to the superficial dermis without  
 446 damaging the epidermis except for the minute holes which heal rapidly. The tiny wounds so  
 447 formed in the superficial dermis cause the release of growth factors and stimulation of the  
 448 formation of new collagen.<sup>15, 76</sup> Penetration of microneedle into the skin causes localized damage  
 449 and rupture of fine blood vessels with minor bleeding.<sup>13</sup> Hundreds of such tiny wounds placed  
 450 close to each other trigger the process of normal wound healing and was shown by different  
 451 studies.<sup>2, 15, 76</sup> The process of normal wound healing progress through three consecutive stages of  
 452 inflammation, proliferation and tissue remodeling.

453 **Stage1: Inflammation stage.** Immediately after the injury chemotactic factors are released by  
 454 platelets and causes further invasion of platelets, neutrophils, and fibroblasts at the site of injury.

455 **Stage2: Proliferation stage.** The neutrophils which are present in the initial stage are replaced  
456 by monocytes which later change into macrophages. These macrophages release various growth  
457 factors like platelet-derived growth factor, fibroblast growth factor, and transforming growth  
458 factors alpha and beta. The migration and proliferation of fibroblasts occur in response to this  
459 stimulation. Keratinocytes increase the production of laminin and collagen types IV and VII  
460 which in turn result in reestablishment of the basement membrane.

461 **Stage3: Remodeling stage.** The major component involved in this stage is fibroblasts which  
462 form collagen in the upper dermis. The whole stage may continue for months after the injury or  
463 may even extend over a period of a year or longer.<sup>15,77</sup>

464 In the initial phases of wound healing the main type of collagen formed is collagen III. During  
465 the tissue remodeling stage it is gradually replaced by collagen I. The gradual conversion of  
466 collagen III into collagen I over a period of a year or more is brought by collagenases and matrix  
467 proteinases, which remains in the area for 5 to 7 years.<sup>78</sup> This whole process of tissue damage,  
468 inflammation and remodelling is known as PCI (percutaneous collagen induction).<sup>15, 76</sup> The  
469 effect of microneedling has also been explained on the basis of a demarcation current produced  
470 among cells when microneedles penetrate the skin, which triggers a cascade of production of  
471 growth factors that stimulate the healing phase.<sup>15, 76</sup> To get optimal results with dermaroller  
472 multiple sittings are generally required with a time interval that varies from 4 to 8 weeks.<sup>16</sup> A  
473 minimum of six weeks is recommended between two treatments as it takes that long for new  
474 natural collagen to form. Three to four treatments may be needed for moderate acne scars.<sup>13</sup> In  
475 different studies, total numbers of treatment session performed varied from 2 to 6. It is not  
476 established yet if more number of sittings could result in still higher efficacy.<sup>16</sup> Apart from acne  
477 scars the technique of microneedling is also used in the management of stretch marks, wrinkles,  
478 photoageing, pigmentary disorders, burn-related scars, and big pores.<sup>13, 79</sup> It is a simple and  
479 relatively cheap modality that also can be used for transdermal drug delivery. Microneedling is  
480 done as a simple office-based procedure. As the microholes formed during the procedure close  
481 immediately, postoperative infections do not occur.<sup>13</sup> The side effects and the downtime are  
482 minimal following the procedure because the enhancement of dermal ECM proteins occurs  
483 without ablation of the epidermis in contrast to the ablative lasers.<sup>80, 81</sup> Thus after dermaroller  
484 treatment, skinbarrier function remains undisturbed and this hastens recovery and limits the risk

485 of scarring.<sup>82</sup> Eventhough much of the epidermis remain intact in other modalities, such as  
486 nonablative and fractional lasers, these can cause thermal activation of melanocytes and  
487 dyspigmentation in patients with darker phototypes .Other lasers can also use wavelengths that  
488 are absorbed by melanin. In contrast, microneedling does not target specific chromophores in the  
489 skin or using thermal energy, and therefore has minimal effect on pigmentation.<sup>78, 83, 84</sup>The  
490 procedure is well tolerated and well accepted by the patients, is cost-effective, can be done on all  
491 skin types and on areas not suitable for peeling or laser resurfacing, such as near eyes.  
492 Microneedling with dermaroller can be combined with other acne scar treatments like subcision,  
493 chemical peels, microdermabrasion, and fractional resurfacing, thus maximizing the benefits to  
494 the patients.<sup>13</sup>

495 Side effects that have been reported in a study by Dogra et al<sup>16</sup> include procedural pain,  
496 transient post procedure erythema, bruising and swelling, PIH and tram-track scarring. Most of  
497 these were mild in nature. PIH was mainly due to inadequate sun protection. Tram-track  
498 patterned scarring was seen as a worst side effect and was thought to be due to larger needling  
499 device or strong pressure exerted while doing the procedure. Photoprotection is the only post  
500 procedure care demanded by the technique.<sup>13</sup>

501 There are various studies comparing the efficacy of microneedling with other modalities for  
502 atrophic post-acne scarring (Table 3). In these studies microneedling was used either alone or in  
503 combination with other modalities to compare the outcome. The outcome of these studies  
504 established microneedling as a successful procedural method for atrophic post-acne scarring.  
505 There is no study on efficacy of topical tazarotene in atrophic post-acne scar to the best of our  
506 knowledge. Our present study is aimed at head to head comparison of topical tazarotene and  
507 microneedling in the improvement of atrophic post-acne scars. If topical tazarotene is proved to  
508 be as effective as microneedling in atrophic post-acne scars, it may change the current  
509 management strategy of atrophic post-acne scarring which is mainly physician dependant.

510

| Author (Year)                          | No. of patients | Study design (final assessment)                                                                       | Treatment sessions (interval)                                               | Scoring method                                                       | Outcome                                                             | Comments                                                        |
|----------------------------------------|-----------------|-------------------------------------------------------------------------------------------------------|-----------------------------------------------------------------------------|----------------------------------------------------------------------|---------------------------------------------------------------------|-----------------------------------------------------------------|
| Majid <sup>85</sup> (2009)             | 36              | PCI (2 months after last session)                                                                     | 4 sessions or satisfactory outcome whichever is earlier (4 weeks)           | Goodman and Baron Qualitative scale<br>1-10 point scale (subjective) | 72.2% improved by 2 grades,<br>16.7% improved by 1 grade.           | Scars other than post acne scars (5 patients) included in study |
| Fabbrocini et al. <sup>15</sup> (2009) | 32              | PCI (8 weeks after last session)                                                                      | 2 (8 weeks)                                                                 | Goodman and Baron Qualitative scale<br>10 point scale                | Significant reduction in severity grade of acne scars               |                                                                 |
| Laheta et al. <sup>76</sup> (2011)     | 30              | Group 1- PCI<br>Group 2- 100% TCA cross (4 weeks after the last session)                              | 4 (4 weeks)                                                                 | Weighted scale followed by a quartile grading scale                  | Mean improvement<br>Group 1- 68.3%<br>Group 2- 75.3%                |                                                                 |
| Sharad <sup>86</sup> (2011)            | 30              | Group A- PCI alone<br>Group B- PCI + 35% GA peel<br>(3 months after the last session)                 | Group A- 5 (6 weeks)<br>Group B- 5 sessions of each alternatively (3 weeks) | ECCA grading                                                         | Mean improvement<br>Group A- 31.33%<br>Group B- 62%                 |                                                                 |
| Leheta et al. <sup>87</sup> (2012)     | 24              | Group 1 : deep peeling using phenol<br>Group 2: PCI combined with TCA 20%<br>( 8 months from starting | Group 1-1<br>Group 2-4<br>(6 weeks)                                         | Weighted scale followed by a quartile grading scale                  | 75.12% and 69.43% improvement in scar in group 1 and 2 respectively | Blinded evaluation                                              |

|                                   |    |                                                                                                                                                                                                       |                                        |                                                                   |                                                                                                                                                                                        |                    |
|-----------------------------------|----|-------------------------------------------------------------------------------------------------------------------------------------------------------------------------------------------------------|----------------------------------------|-------------------------------------------------------------------|----------------------------------------------------------------------------------------------------------------------------------------------------------------------------------------|--------------------|
|                                   |    | the treatment )                                                                                                                                                                                       |                                        |                                                                   |                                                                                                                                                                                        |                    |
| Lehetaet al. <sup>88</sup> (2012) | 39 | <p>Group 1 - PCI +20% TCA</p> <p>Group 2 - 1540 nm nonablative fractional laser</p> <p>Group 3 - alternating treatment with above two modalities.</p> <p>(12 months from starting the treatment )</p> | In all the groups 6 sessions (4 weeks) | <p>Weighted scale</p> <p>Followed by a quartile grading scale</p> | 59.79%, 61.83%, 78.27% improvement in Group 1, 2, 3 respectively.                                                                                                                      | Blinded evaluation |
| Chawla <sup>89</sup> (2014)       | 30 | <p>Split face study</p> <p>PCI + PRP on right side</p> <p>PCI +vitamin C on left side of the face (after the last session)</p>                                                                        | 4 (1 month)                            | Goodman and Baron Qualitative scale                               | Reduction in scarring by two grades seen in 18.5% patients with PRP as compared to 7% patients who received treatment with vitamin C. Up gradation by one score similar in both cases. |                    |
| Dogra et al. <sup>16</sup> (2014) | 36 | PCI (1 month after last session)                                                                                                                                                                      | 5 (4 weeks)                            | Photograph assessment on a quartile scale                         | Mean 50%-75% improvement in the majority of subjects                                                                                                                                   |                    |

|                                  |    |                                                                                                                                                                                                           |                   |                                                                     |                                                                                                                                                                                                                                                                  |                    |
|----------------------------------|----|-----------------------------------------------------------------------------------------------------------------------------------------------------------------------------------------------------------|-------------------|---------------------------------------------------------------------|------------------------------------------------------------------------------------------------------------------------------------------------------------------------------------------------------------------------------------------------------------------|--------------------|
| Asif et al. <sup>90</sup> (2015) | 50 | Split face study-<br>PCI + Intra-dermal injections and topical application of PRP on right half;<br>PCI + intra-dermal administration of distilled water on left half<br><br>(1 month after last session) | 3<br><br>(1month) | Goodman and Baron Qualitative scale<br>Goodman's Quantitative scale | Right and left halves showed 62.20% and 45.84% improvement, respectively, on Goodman's Quantitative scale.<br><br>40% improved by 2 grades and 60% improved by 1 grade over right half vs 10% and 84% respectively over left half on Goodman's Qualitative scale | Blinded evaluation |
|----------------------------------|----|-----------------------------------------------------------------------------------------------------------------------------------------------------------------------------------------------------------|-------------------|---------------------------------------------------------------------|------------------------------------------------------------------------------------------------------------------------------------------------------------------------------------------------------------------------------------------------------------------|--------------------|

511

512 **Table 1. Review of literature on microneedling in atrophic acne scar.**513 ECCA= Echelled'Evaluationclinique des Cicatrices d'acne'; PCI=Per-cutaneous collagen  
514 induction; PRP=Platelet rich plasma; TCA=Trichloro acetic acid; GA=Glycolic acid

515



516

**AIMS AND OBJECTIVES**517 **Primary objective:**

518 To compare the efficacy of microneedling versus topical 0.1 % tazarotene gel in the management  
519 of moderate to severe atrophic acne scars.

520 **Secondary objective:**

521 To evaluate the tolerability and adverse effects of the two treatment options.

522

523

## **MATERIALS AND METHODS**

524 **Design:** Prospective, single blinded, randomized, pilot study.

525 **Methodology:**

526 Patients with atrophic acne scars attending Dermatosurgery Clinic of Department of  
527 Dermatology, Venereology and Leprology; Postgraduate Institute of Medical Education and  
528 Research, Chandigarh, India will be screened for the study. A total of 36 subjects of atrophic  
529 post acne scars who are satisfying inclusion and exclusion criteria will be recruited.

530 **Inclusion Criteria:**

- 531 • Patients with grade 2 to grade 4 atrophic acne scars, classified on the basis of Goodman's  
532 Qualitative classification.<sup>6</sup>
- 533 • Should not have undergone any surgical and/or laser treatment for acne scars in the past 1  
534 year.

535

536 **Exclusion Criteria:**

- 537 • Active acne
- 538 • History of keloidal tendency/hypertrophic or keloidal scarring on the face due to acne
- 539 • Facial scars due to reasons other than acne like varicella, trauma, burns etc
- 540 • Collagen vascular disease, bleeding disorders
- 541 • Any active bacterial , fungal or viral infection over face
- 542 • Pregnant and lactating females
- 543 • Known hypersensitivity to tazarotene
- 544 • Age less than 18 years
- 545 • Patients on anticoagulant therapy or aspirin

546

547 In this split-face design, the face of each patient will be randomized for microneedling on one  
548 side and topical tazarotene 0.1 % gel on opposite side. Randomisation will be done using  
549 computer generated random number table. Follow ups will be done at every month until  
550 treatment completion (3 months) and 3 months after last treatment session. Patient assessment  
551 will be done using subjective and objective methods. Study design is depicted in Figure6.

552

553 **Primary outcome:**

- 554 • Change in acne scar severity grade from baseline at 3 months, and at 6months.

555

556 **Secondary outcomes:**

- 557 • Patient satisfaction using *Patient's global assessment score*.
- 558 • Adverse events if any.

559

## Study design

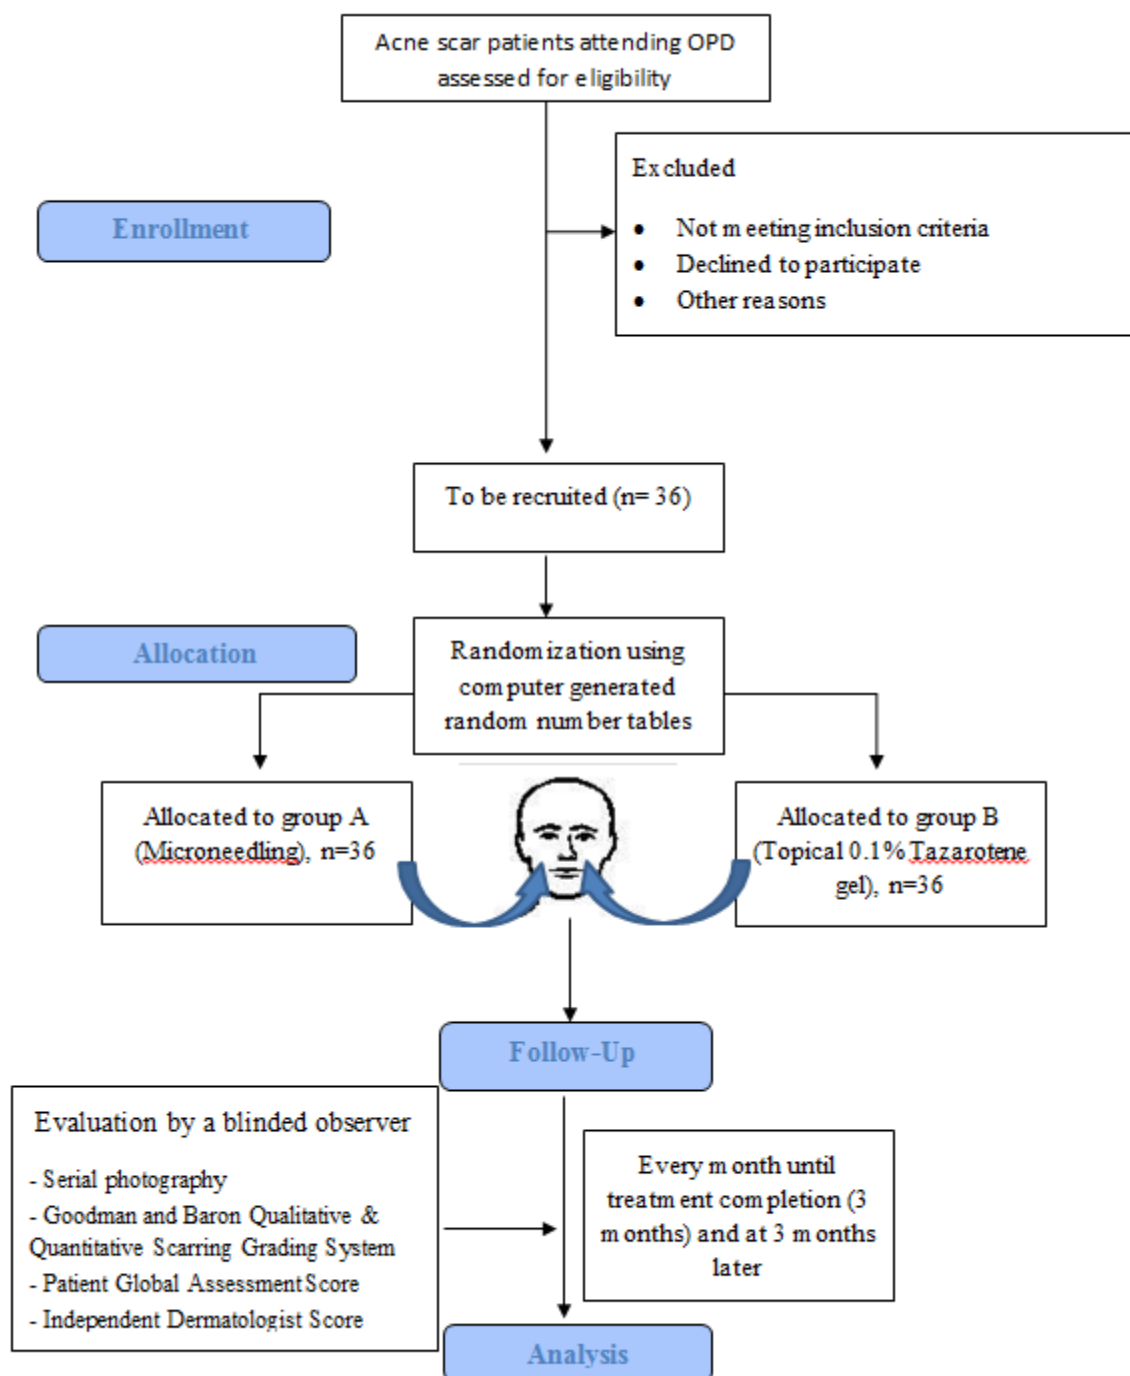

560

561

Figure 6: Study design

562

563

564 **Patient Assessment**

565 A detailed history, including onset, course, and duration of scars, previous acne and acne scar  
566 treatments, and post-treatment complications such as hyperpigmentation or keloid formation will  
567 be taken. Subjects will be then recruited based on inclusion/exclusion criteria.

568 At the first visit, a pro forma will be filled noting the baseline characteristics, history and  
569 examination findings. Dermatologic examination to assess the skin type, the scar type (ice pick,  
570 boxcar, and rolling type), the scar severity according to the Goodman and Baron qualitative and  
571 quantitative acne scarring grading system (Table 1 and 2) will be performed for every patient.  
572 Complete hemogram, renal function tests, liver function tests, prothrombin time, partial  
573 thromboplastin time and urine pregnancy test (in female patients) will be performed for every  
574 patient. Baseline photography will be performed in the same settings with respect to patient  
575 positioning, background, lighting and camera settings for every patient.

576 Possible side effects of each procedure such as erythema, edema, exfoliation, pain and  
577 hyperpigmentation will also be explained. Then, informed consent will be taken for the  
578 procedure from every patient.

579

580 **Table 1 --- Goodman and Baron Qualitative Scarring Grading System<sup>6</sup>**

| Grades of Post<br>acne Scarring | Level of<br>Disease | Clinical features                                                                                                                                                                                                                                 |
|---------------------------------|---------------------|---------------------------------------------------------------------------------------------------------------------------------------------------------------------------------------------------------------------------------------------------|
| 1                               | Macular             | Erythematous, hyper/hypo pigmented flat marks. No contour changes.                                                                                                                                                                                |
| 2                               | Mild                | Mild atrophy or hypertrophy scars that may not be obvious at social distances of 50 cm or greater and may be covered adequately by make up or the normal shadow of hairs.                                                                         |
| 3                               | Moderate            | Moderate atrophic or hypertrophic scarring that is obvious at social distances of 50 cm or greater and is not covered adequately by make up or the normal shadow of hairs; but is still able to be flattened by manual stretching of the skin (if |

|   |        |                                                                                                                                                                                                                                           |
|---|--------|-------------------------------------------------------------------------------------------------------------------------------------------------------------------------------------------------------------------------------------------|
|   |        | atrophic).                                                                                                                                                                                                                                |
| 4 | Severe | Severe atrophic or hypertrophic scarring that is evident at social distances greater than 50 cm and is not covered easily by make up or the normal shadow of the hairs; and is not able to be flattened by manual stretching of the skin. |

581

582

583

584 **Table 2 Goodmans Quantitative Global Acne Scarring Grading System<sup>7</sup>**

585

| <b>Grade or Type</b>                                                                                                                                                                                                                        | <b>Number of Lesions<br/>1 (1-10)</b> | <b>Number of Lesions<br/>2 (11-20)</b> | <b>Number of Lesions<br/>3(&gt;20)</b> |
|---------------------------------------------------------------------------------------------------------------------------------------------------------------------------------------------------------------------------------------------|---------------------------------------|----------------------------------------|----------------------------------------|
| <b>A) Milder scarring (1 point each)</b><br>Macular erythematous pigmented<br>Mildly atrophic, dish like                                                                                                                                    | 1                                     | 2                                      | 3                                      |
| <b>B) Moderate scarring (2 points each)</b><br>Moderately atrophic, dish like<br>Punched out with shallow bases small scars (<5mm)                                                                                                          | 2                                     | 4                                      | 6                                      |
| <b>C) Severe scarring (3 points each)</b><br>Punched out with deep but normal bases, small scars (<5mm)<br>Punched out with deep but abnormal bases, small scars (<5mm)<br>Linear or troughed dermal scarring<br>Deep, broad atrophic areas | 3                                     | 6                                      | 9                                      |
| <b>D) Hyperplastic</b><br>Papular scars<br>Keloidal/Hypertrophic scars                                                                                                                                                                      | 2 (Area <5mm)<br>6                    | 4 (Area 5-20 cm <sup>2</sup> )<br>12   | 6 (Area >20 cm <sup>2</sup> )<br>18    |

586

587

588

589

590 **Treatment protocol:**

591 After patient selection, the face of each subject will be randomized to receive microneedling  
592 on one side (group A) and topical tazarotene gel on opposite side (group B). In this study design;  
593 subject's face is arbitrarily divided into two equal halves by drawing arbitrary line touching  
594 glabella and mid chin through tip of nose. Randomisation will be done using computer generated  
595 random number tables. One set of eighteen random numbers ranging from 1 – 36 are generated  
596 in sequence. Those patients falling in this random number sequence will get microneedling on  
597 right side of face and tazarotene 0.1% gel treatment on left side of face, while others will get  
598 treatment vice versa.

599 **Group A:** The treatment protocol in the group A will consist of four sessions of  
600 microneedling at monthly intervals. (0, 1, 2, 3 months)

601 **Group B:** The treatment protocol in the group B will consist of night time application of  
602 Tazarotene 0.1% gel during the entire study period. (3 months)

603 **Microneedling:**

604 Microneedling treatment will be performed with a standard dermaroller by the same investigator,  
605 for a total of four sittings at monthly intervals. Prior to the procedure, thick layer of topical  
606 anesthetic mixture (lignocaine and prilocaine) under occlusion will be applied over face and left  
607 for 1 hour. Dermaroller with 1.5 mm needle length will be used. Patients will be placed in supine  
608 position with head stable and rolling will be performed eight times in four different directions,  
609 perpendicular and diagonal to each other with to-and-fro motion. The end point will be uniform  
610 pinpoint bleeding. Uniform and firm pressure will be applied to the roller, and the performing  
611 physician will remain the same throughout the study. After treatment, the area is wetted with  
612 saline pads. The face will be cleaned with distilled water after 1 hour and any bruise or other  
613 adverse effects will be noted if any. The subjects will be instructed to follow strict photo  
614 protective measures including application of broad spectrum sunscreen (SPF 30).

615 **Topical Tazarotene 0.1% gel**

616 Patients will be instructed to apply 0.1% tazarotene gel as a thin film over the affected area once  
617 daily in the evening. . They will be instructed to apply tazarotene 0.1% gel approximately 15 to

618 20 minutes after washing their face in the evening by placing a pea-sized amount in the palm of  
619 their hand and, using the tip of a finger to cover the entire half of face. Patients who experience  
620 facial dryness will be allowed to use a moisturizing cream during the day (entire face), but the  
621 use of any other lotions, creams, medicated powders, or solutions on the face will be prohibited.  
622 They will also be instructed to follow strict photo protective measures including application of  
623 broad spectrum sunscreen of SPF 30.

#### 624 **Follow-up**

625 All the patients will be followed up at monthly intervals for three months and then at 6<sup>th</sup> month  
626 from baseline. Digital photography will be done at 3<sup>rd</sup> and 6<sup>th</sup> month follow up visits. Any  
627 adverse effect experienced by the patient will be noted separately on each side of the face at each  
628 follow-up visits. In addition, the tolerability of the medication will be evaluated for erythema,  
629 burning, peeling, and dryness.

630 Goodman's qualitative and quantitative acne scarring grading system scoring will be performed  
631 at 3<sup>rd</sup> and 6<sup>th</sup> month follow up visits. Patients will be also assessed by an independent  
632 dermatologist (TN/SD) for clinical improvement and scored on a scale of 0 (no improvement) to  
633 10 (maximum) at 3<sup>rd</sup> and 6<sup>th</sup> month follow up visits. All patients will be instructed to assess  
634 themselves using Patients' Global Assessment Score 0 (no response) to 10 (maximum) at 3<sup>rd</sup> and  
635 6<sup>th</sup> month follow up visits. If required, previous self-scores will also be shown to each patient  
636 and thus allowing assessment of the degree of improvement to make further changes in the  
637 scores. Hence, both objective and subjective evaluation of the results shall be done. Pre- and post-  
638 treatment Goodman's Qualitative and Quantitative scores, independent dermatologist score, and  
639 patient satisfaction scores will be timely updated on an excel sheet for each patient.

#### 640 **Pre- and post-treatment Goodman's Qualitative and Quantitative score**

641 The scars will be graded using grading system as used in the beginning (Goodman and Baron  
642 qualitative and quantitative acne scarring grading system) at 3<sup>rd</sup> and 6<sup>th</sup> month follow up visits.  
643 The improvement will be rated as poor, good and excellent depending upon the change in grade  
644 of acne scars. An improvement by two grades will be considered as excellent, one grade will be  
645 rated as good and no up gradation will be labelled as poor response.



646 **Patients' Global Assessment Score**

647 Final patient satisfaction scores will be calculated for right and left halves of face of each patient.  
648 Score 0 was taken as unsatisfied, 1–3 slightly satisfied, 4–5 satisfied, 6–7 fairly satisfied, and 8–  
649 10 highly satisfied.

650 **Photographic evaluation**

651 The patients will be photographed using a 16.1 mega pixels digital camera at the baseline and at  
652 3<sup>rd</sup> and 6<sup>th</sup> month follow up visits. Digital photographs of both sides of the face will be taken  
653 under consistent background, position and lighting and compared with the pre-treatment images.  
654 Photographs will be captured at a distance of 50 and 10 cm of both halves of the face. Later,  
655 these photographs will be assessed by an independent dermatologist (TN/SD) for the final  
656 evaluation of acne scars.

657 **Independent dermatologist score**

658 Final independent dermatologist scores will be calculated for right and left halves of face of each  
659 patient. Score 0 was taken as no response, 1–3 poor response, 4–5 fair response, 6–7 good  
660 response and 8–10 excellent response.

661

662

663

664

665

666

667

668

669

670

## STATISTICAL ANALYSIS

671  
672  
673  
674  
675  
676  
677  
678  
679  
680  
681  
682  
683  
684  
685  
686  
687  
688  
689  
690  
691  
692  
693  
694  
695

Sample size was estimated based on previous studies on microneedling. Our sample size came out to be 32 patients at a power of 80% & confidence interval of 95%. For possible dropouts, it was decided to include 36 patients.

The statistical analysis will be carried out using Statistical Package for Social Sciences (SPSS Inc., Chicago, IL, version 22.0 for Windows). Discrete categorical data will be presented as n (%); Continuous data will be written as either in the form of its mean and standard deviation or in the form of its median and interquartile range, as per the requirement. The Normality of quantitative data will be checked by measures of Kolmogorov-Smirnov tests of Normality. For time related variables of scores or for comparison of two sides of scores, Wilcoxon Signed rank test will be applied; for normally distributed data ANOVA followed by Post Hoc Multiple Comparisons test (Dunnet t-test) will be carried out. Categorical data comparisons will be made by Pearson Chi-square test or Fisher's exact test as appropriate. All the statistical tests will be two-sided and will be performed at a significance level of  $\alpha=.05$ .

**ETHICAL JUSTIFICATION**

696  
697  
698  
699  
700  
701  
702  
703  
704  
705  
706  
707  
708  
709  
710  
711  
712  
713  
714  
715  
716  
717  
718  
719  
720  
721

This planned study is to be undertaken in patients of atrophic post acne scars. Microneedling is one of the common surgical procedures performed in day care setting for the improvement of acne scars with minimal side effects, if any. Topical tazarotene has been used in the treatment of acne and post acne scars. Both the procedures are to be carried out in the day care settings, without any in-patient hospital stay. These treatment modalities are affordable to most of the patients and do not impart much financial burden. By this study our aim is to establish topical tazarotene 0.1% gel as an effective method in the treatment of atrophic post acne scars using microneedling as a control. This in the long run will be helpful to the patients in terms of cost-effectiveness and ultimately the outcome.

Informed consent will be obtained from each patient prior to recruitment in the study. Patients will be explained regarding the study and the two treatment modalities used. To detect any adverse effect at the earliest, periodic visits of the patient are planned at regular intervals and will be managed accordingly. All necessary steps would be undertaken to ensure safety and convenience to the patients during entire study period.

Confidentiality of the study subjects will be maintained. No element of compulsion will be exerted. Moreover, the patients who may deny participating, would be excluded from study without asking for any reason thereof.

**BIBLIOGRAPHY**

- 722
- 723
- 724 1. Adityan B, Thappa DM. Profile of acne vulgaris--a hospital-based study from South  
725 India. *Indian J Dermatol Venereol Leprol.* 2009;75:272-8.
- 726 2. Fife D. Practical evaluation and management of atrophic acne scars: tips for the general  
727 dermatologist. *J Clin Aesthet Dermatol.* 2011;4:50-7.
- 728 3. Wolfram D, Tzankov A, Pulzl P, Piza-Katzer H. Hypertrophic scars and keloids--a  
729 review of their pathophysiology, risk factors, and therapeutic management. *Dermatol Surg.*  
730 2009;35:171-81.
- 731 4. Chivot M, Pawin H, Beylot C, Chosidow O, Dreno B, Faure M, et al. [Acne scars:  
732 epidemiology, physiopathology, clinical features and treatment]. *Ann Dermatol Venereol.*  
733 2006;133:813-24.
- 734 5. Jacob CI, Dover JS, Kaminer MS. Acne scarring: a classification system and review of  
735 treatment options. *J Am Acad Dermatol.* 2001;45:109-17.
- 736 6. Goodman GJ, Baron JA. Postacne scarring: a qualitative global scarring grading system.  
737 *Dermatol Surg.* 2006;32:1458-66.
- 738 7. Goodman GJ, Baron JA. Postacne scarring--a quantitative global scarring grading  
739 system. *J Cosmet Dermatol.* 2006;5:48-52.
- 740 8. Bikowski JB. Mechanisms of the comedolytic and anti-inflammatory properties of topical  
741 retinoids. *J Drugs Dermatol.* 2005;4:41-7.
- 742 9. Chen M, Goyal S, Cai X, O'Toole EA, Woodley DT. Modulation of type VII collagen  
743 (anchoring fibril) expression by retinoids in human skin cells. *Biochim Biophys Acta.*  
744 1997;1351:333-40.
- 745 10. Shalita AR, Chalker DK, Griffith RF, Herbert AA, Hickman JG, Maloney JM, et al.  
746 Tazarotene gel is safe and effective in the treatment of acne vulgaris: a multicenter, double-blind,  
747 vehicle-controlled study. *Cutis.* 1999;63:349-54.
- 748 11. Shalita AR, Berson DS, Thiboutot DM, Leyden JJ, Parizadeh D, Sefton J, et al. Effects of  
749 tazarotene 0.1 % cream in the treatment of facial acne vulgaris: pooled results from two  
750 multicenter, double-blind, randomized, vehicle-controlled, parallel-group trials. *Clin Ther.*  
751 2004;26:1865-73.

- 752 12. Webster GF, Guenther L, Poulin YP, Solomon BA, Loven K, Lee J. A multicenter,  
753 double-blind, randomized comparison study of the efficacy and tolerability of once-daily  
754 tazarotene 0.1% gel and adapalene 0.1% gel for the treatment of facial acne vulgaris. *Cutis*.  
755 2002;69:4-11.
- 756 13. Doddaballapur S. Microneedling with dermaroller. *J Cutan Aesthet Surg*. 2009;2:110-1.
- 757 14. Fernandes D. Minimally invasive percutaneous collagen induction. *Oral Maxillofac Surg*  
758 *Clin North Am*. 2005;17:51-63, vi.
- 759 15. Fabbrocini G, Fardella N, Monfrecola A, Proietti I, Innocenzi D. Acne scarring treatment  
760 using skin needling. *Clin Exp Dermatol*. 2009;34:874-9.
- 761 16. Dogra S, Yadav S, Sarangal R. Microneedling for acne scars in Asian skin type: an  
762 effective low cost treatment modality. *J Cosmet Dermatol*. 2014;13:180-7.
- 763 17. Phillips TJ, Gottlieb AB, Leyden JJ, Lowe NJ, Lew-Kaya DA, Sefton J, et al. Efficacy of  
764 0.1% tazarotene cream for the treatment of photodamage: a 12-month multicenter, randomized  
765 trial. *Arch Dermatol*. 2002;138:1486-93.
- 766 18. Harris HH, Downing DT, Stewart ME, Strauss JS. Sustainable rates of sebum secretion in  
767 acne patients and matched normal control subjects. *J Am Acad Dermatol*. 1983;8:200-3.
- 768 19. Kligman AM, Wheatley VR, Mills OH. Comedogenicity of human sebum. *Arch*  
769 *Dermatol*. 1970;102:267-75.
- 770 20. Trivedi NR, Cong Z, Nelson AM, Albert AJ, Rosamilia LL, Sivarajah S, et al.  
771 Peroxisome proliferator-activated receptors increase human sebum production. *J Invest*  
772 *Dermatol*. 2006;126:2002-9.
- 773 21. Pochi PE, Strauss JS. Sebaceous gland response in man to the administration of  
774 testosterone, delta-4-androstenedione, and dehydroisoandrosterone. *J Invest Dermatol*.  
775 1969;52:32-6.
- 776 22. Ganceviciene R, Graziene V, Fimmel S, Zouboulis CC. Involvement of the corticotropin-  
777 releasing hormone system in the pathogenesis of acne vulgaris. *Br J Dermatol*. 2009;160:345-52.
- 778 23. Downing DT, Stewart ME, Wertz PW, Strauss JS. Essential fatty acids and acne. *J Am*  
779 *Acad Dermatol*. 1986;14:221-5.
- 780 24. Guy R, Green MR, Kealey T. Modeling acne in vitro. *J Invest Dermatol*. 1996;106:176-  
781 82.

- 782 25. Melnik B, Schmitz G. FGFR2 signaling and the pathogenesis of acne. *J Dtsch Dermatol*  
783 *Ges.* 2008;6:721-8.
- 784 26. Holmes RL, Williams M, Cunliffe WJ. Pilo-sebaceous duct obstruction and acne. *Br J*  
785 *Dermatol.* 1972;87:327-32.
- 786 27. Webster GF, Indrisano JP, Leyden JJ. Antibody titers to *Propionibacterium acnes* cell  
787 wall carbohydrate in nodulocystic acne patients. *J Invest Dermatol.* 1985;84:496-500.
- 788 28. Norris JF, Cunliffe WJ. A histological and immunocytochemical study of early acne  
789 lesions. *Br J Dermatol.* 1988;118:651-9.
- 790 29. Jeremy AH, Holland DB, Roberts SG, Thomson KF, Cunliffe WJ. Inflammatory events  
791 are involved in acne lesion initiation. *J Invest Dermatol.* 2003;121:20-7.
- 792 30. Webster GF, Leyden JJ, Nilsson UR. Complement activation in acne vulgaris:  
793 consumption of complement by comedones. *Infect Immun.* 1979;26:183-6.
- 794 31. Puhvel SM, Hoffman IK, Reisner RM, Sternberg TH. Dermal hypersensitivity of patients  
795 with acne vulgaris to *Corynebacterium acnes*. *J Invest Dermatol.* 1967;49:154-8.
- 796 32. Abdel Fattah NS, Shaheen MA, Ebrahim AA, El Okda ES. Tissue and blood superoxide  
797 dismutase activities and malondialdehyde levels in different clinical severities of acne vulgaris.  
798 *Br J Dermatol.* 2008;159:1086-91.
- 799 33. Vowels BR, Yang S, Leyden JJ. Induction of proinflammatory cytokines by a soluble  
800 factor of *Propionibacterium acnes*: implications for chronic inflammatory acne. *Infect Immun.*  
801 1995;63:3158-65.
- 802 34. Kim J, Ochoa MT, Krutzik SR, Takeuchi O, Uematsu S, Legaspi AJ, et al. Activation of  
803 toll-like receptor 2 in acne triggers inflammatory cytokine responses. *J Immunol.*  
804 2002;169:1535-41.
- 805 35. Martin P, Leibovich SJ. Inflammatory cells during wound repair: the good, the bad and  
806 the ugly. *Trends Cell Biol.* 2005;15:599-607.
- 807 36. Holland DB, Jeremy AH, Roberts SG, Seukeran DC, Layton AM, Cunliffe WJ.  
808 Inflammation in acne scarring: a comparison of the responses in lesions from patients prone and  
809 not prone to scar. *Br J Dermatol.* 2004;150:72-81.
- 810 37. Stadelmann WK, Digenis AG, Tobin GR. Physiology and healing dynamics of chronic  
811 cutaneous wounds. *Am J Surg.* 1998;176:26s-38s.

- 812 38. Baum CL, Arpey CJ. Normal cutaneous wound healing: clinical correlation with cellular  
813 and molecular events. *Dermatol Surg.* 2005;31:674-86.
- 814 39. Midwood KS, Williams LV, Schwarzbauer JE. Tissue repair and the dynamics of the  
815 extracellular matrix. *Int J Biochem Cell Biol.* 2004;36:1031-7.
- 816 40. Fabbrocini G, Annunziata MC, D'Arco V, De Vita V, Lodi G, Mauriello MC, et al. Acne  
817 scars: pathogenesis, classification and treatment. *Dermatol Res Pract.* 2010;2010:893080.
- 818 41. Dreno B, Khammari A, Orain N, Noray C, Merial-Kieny C, Mery S, et al. ECCA grading  
819 scale: an original validated acne scar grading scale for clinical practice in dermatology.  
820 *Dermatology.* 2007;214:46-51.
- 821 42. Orentreich DS, Orentreich N. Subcutaneous incisionless (subcision) surgery for the  
822 correction of depressed scars and wrinkles. *Dermatol Surg.* 1995;21:543-9.
- 823 43. Goodman G. Post acne scarring: a review. *J Cosmet Laser Ther.* 2003;5:77-95.
- 824 44. Orentreich D, Orentreich N. Acne scar revision update. *Dermatol Clin.* 1987;5:359-68.
- 825 45. Roenigk HH, Jr. Dermabrasion: state of the art. *J Dermatol Surg Oncol.* 1985;11:306-14.
- 826 46. Tsai RY, Wang CN, Chan HL. Aluminum oxide crystal microdermabrasion. A new  
827 technique for treating facial scarring. *Dermatol Surg.* 1995;21:539-42.
- 828 47. Atkins D, Frodel J. Skin rejuvenation in facial surgery. *Facial Plast Surg.* 2006;22:129-  
829 39.
- 830 48. Bauman L. CosmoDerm/CosmoPlast (human bioengineered collagen) for the aging face.  
831 *Facial Plast Surg.* 2004;20:125-8.
- 832 49. Lemperle G, Romano JJ, Busso M. Soft tissue augmentation with artecoll: 10-year  
833 history, indications, techniques, and complications. *Dermatol Surg.* 2003;29:573-87.
- 834 50. Walia S, Alster TS. Prolonged clinical and histologic effects from CO2 laser resurfacing  
835 of atrophic acne scars. *Dermatol Surg.* 1999;25:926-30.
- 836 51. Goldberg DJ. Nonablative laser surgery for pigmented skin. *Dermatol Surg.*  
837 2005;31:1263-7.
- 838 52. Alster TS, Tanzi EL, Lazarus M. The use of fractional laser photothermolysis for the  
839 treatment of atrophic scars. *Dermatol Surg.* 2007;33:295-9.
- 840 53. Chapas AM, Brightman L, Sukal S, Hale E, Daniel D, Bernstein LJ, et al. Successful  
841 treatment of acneiform scarring with CO2 ablative fractional resurfacing. *Lasers Surg Med.*  
842 2008;40:381-6.

- 843 54. Bellew SG, Weiss MA, Weiss RA. Comparison of intense pulsed light to 595-nm long-  
844 pulsed pulsed dye laser for treatment of hypertrophic surgical scars: a pilot study. *J Drugs*  
845 *Dermatol.* 2005;4:448-52.
- 846 55. Thielitz A, Gollnick H. Topical retinoids in acne vulgaris: update on efficacy and safety.  
847 *Am J Clin Dermatol.* 2008;9:369-81.
- 848 56. Sorg O, Antille C, Kaya G, Saurat JH. Retinoids in cosmeceuticals. *Dermatol Ther.*  
849 2006;19:289-96.
- 850 57. Foster RH, Brogden RN, Benfield P. Tazarotene. *Drugs.* 1998;55:705-11; discussion 12.
- 851 58. Kligman AM, Willis I. A new formula for depigmenting human skin. *Arch Dermatol.*  
852 1975;111:40-8.
- 853 59. Bulengo-Ransby SM, Griffiths CE, Kimbrough-Green CK, Finkel LJ, Hamilton TA, Ellis  
854 CN, et al. Topical tretinoin (retinoic acid) therapy for hyperpigmented lesions caused by  
855 inflammation of the skin in black patients. *N Engl J Med.* 1993;328:1438-43.
- 856 60. Yoshimura K, Harii K, Aoyama T, Iga T. Experience with a strong bleaching treatment  
857 for skin hyperpigmentation in Orientals. *Plast Reconstr Surg.* 2000;105:1097-108.
- 858 61. Burns RL, Prevost-Blank PL, Lawry MA, Lawry TB, Faria DT, Fivenson DP. Glycolic  
859 acid peels for postinflammatory hyperpigmentation in black patients. A comparative study.  
860 *Dermatol Surg.* 1997;23:171-4.
- 861 62. Jacyk WK. Adapalene in the treatment of African patients. *J Eur Acad Dermatol*  
862 *Venereol.* 2001;15 Suppl 3:37-42.
- 863 63. Kang S, Leyden JJ, Lowe NJ, Ortonne JP, Phillips TJ, Weinstein GD, et al. Tazarotene  
864 cream for the treatment of facial photodamage: a multicenter, investigator-masked, randomized,  
865 vehicle-controlled, parallel comparison of 0.01%, 0.025%, 0.05%, and 0.1% tazarotene creams  
866 with 0.05% tretinoin emollient cream applied once daily for 24 weeks. *Arch Dermatol.*  
867 2001;137:1597-604.
- 868 64. Kang S. The mechanism of action of topical retinoids. *Cutis.* 2005;75:10-3.
- 869 65. Elder JT, Astrom A, Pettersson U, Tavakkol A, Krust A, Kastner P, et al. Retinoic acid  
870 receptors and binding proteins in human skin. *J Invest Dermatol.* 1992;98:36s-41s.
- 871 66. Chen S, Ostrowski J, Whiting G, Roalsvig T, Hammer L, Currier SJ, et al. Retinoic acid  
872 receptor gamma mediates topical retinoid efficacy and irritation in animal models. *J Invest*  
873 *Dermatol.* 1995;104:779-83.



- 874 67. Lavker RM, Leyden JJ, Thorne EG. An ultrastructural study of the effects of topical  
875 tretinoin on microcomedones. *Clin Ther.* 1992;14:773-80.
- 876 68. Nagpal S, Chandraratna RA. Recent developments in receptor-selective retinoids. *Curr*  
877 *Pharm Des.* 2000;6:919-31.
- 878 69. Jones DA. The potential immunomodulatory effects of topical retinoids. *Dermatol Online*  
879 *J.* 2005;11:3.
- 880 70. Liu PT, Krutzik SR, Kim J, Modlin RL. Cutting edge: all-trans retinoic acid down-  
881 regulates TLR2 expression and function. *J Immunol.* 2005;174:2467-70.
- 882 71. Menter A. Pharmacokinetics and safety of tazarotene. *J Am Acad Dermatol.*  
883 2000;43:S31-5.
- 884 72. Tang-Liu DD, Matsumoto RM, Usansky JI. Clinical pharmacokinetics and drug  
885 metabolism of tazarotene: a novel topical treatment for acne and psoriasis. *Clin Pharmacokinet.*  
886 1999;37:273-87.
- 887 73. Bershad S, Kranjac Singer G, Parente JE, Tan MH, Sherer DW, Persaud AN, et al.  
888 Successful treatment of acne vulgaris using a new method: results of a randomized vehicle-  
889 controlled trial of short-contact therapy with 0.1% tazarotene gel. *Arch Dermatol.* 2002;138:481-  
890 9.
- 891 74. Leyden JJ. Meta-analysis of topical tazarotene in the treatment of mild to moderate acne.  
892 *Cutis.* 2004;74:9-15.
- 893 75. Marks R. Pharmacokinetics and safety review of tazarotene. *J Am Acad Dermatol.*  
894 1998;39:S134-8.
- 895 76. Leheta T, El Tawdy A, Abdel Hay R, Farid S. Percutaneous collagen induction versus  
896 full-concentration trichloroacetic acid in the treatment of atrophic acne scars. *Dermatol Surg.*  
897 2011;37:207-16.
- 898 77. Helfrich YR, Sachs DL, Voorhees JJ. Overview of skin aging and photoaging. *Dermatol*  
899 *Nurs.* 2008;20:177-83; quiz 84.
- 900 78. Fernandes D, Signorini M. Combating photoaging with percutaneous collagen induction.  
901 *Clin Dermatol.* 2008;26:192-9.
- 902 79. Birchall JC, Clemo R, Anstey A, John DN. Microneedles in clinical practice--an  
903 exploratory study into the opinions of healthcare professionals and the public. *Pharm Res.*  
904 2011;28:95-106.

- 905 80. Habbema L, Verhagen R, Van Hal R, Liu Y, Varghese B. Minimally invasive non-  
906 thermal laser technology using laser-induced optical breakdown for skin rejuvenation. *J*  
907 *Biophotonics*. 2012;5:194-9.
- 908 81. El-Domyati M, El-Ammawi TS, Medhat W, Moawad O, Mahoney MG, Uitto J. Multiple  
909 minimally invasive Erbium: Yttrium Aluminum Garnet laser mini-peels for skin rejuvenation: an  
910 objective assessment. *J Cosmet Dermatol*. 2012;11:122-30.
- 911 82. Cohen BE, Elbuluk N. Microneedling in skin of color: A review of uses and efficacy. *J*  
912 *Am Acad Dermatol*. 2016;74:348-55.
- 913 83. Fabbrocini G, De Vita V, Fardella N, Pastore F, Annunziata MC, Mauriello MC, et al.  
914 Skin needling to enhance depigmenting serum penetration in the treatment of melasma. *Plast*  
915 *Surg Int*. 2011;2011:158241.
- 916 84. Aust MC, Reimers K, Repenning C, Stahl F, Jahn S, Guggenheim M, et al. Percutaneous  
917 collagen induction: minimally invasive skin rejuvenation without risk of hyperpigmentation-fact  
918 or fiction? *Plast Reconstr Surg*. 2008;122:1553-63.
- 919 85. Majid I. Microneedling therapy in atrophic facial scars: an objective assessment. *J Cutan*  
920 *Aesthet Surg*. 2009;2:26-30.
- 921 86. Sharad J. Combination of microneedling and glycolic acid peels for the treatment of acne  
922 scars in dark skin. *J Cosmet Dermatol*. 2011;10:317-23.
- 923 87. Leheta TM, Abdel Hay RM, El Garem YF. Deep peeling using phenol versus  
924 percutaneous collagen induction combined with trichloroacetic acid 20% in atrophic post-acne  
925 scars; a randomized controlled trial. *J Dermatolog Treat*. 2014;25:130-6.
- 926 88. Leheta TM, Abdel Hay RM, Hegazy RA, El Garem YF. Do combined alternating  
927 sessions of 1540 nm nonablative fractional laser and percutaneous collagen induction with  
928 trichloroacetic acid 20% show better results than each individual modality in the treatment of  
929 atrophic acne scars? A randomized controlled trial. *J Dermatolog Treat*. 2014;25:137-41.
- 930 89. Chawla S. Split face comparative study of microneedling with PRP versus microneedling  
931 with vitamin C in treating atrophic post acne scars. *J Cutan Aesthet Surg*. 2014;7:209-12.
- 932 90. Asif M, Kanodia S, Singh K. Combined autologous platelet-rich plasma with  
933 microneedling verses microneedling with distilled water in the treatment of atrophic acne scars: a  
934 concurrent split-face study. *J Cosmet Dermatol*. 2016;15:434-43.

**ANNEXURE I****CONSENT FORM****Department of Dermatology, Venereology and Leprology****Postgraduate Institute of Medical Education and Research, Chandigarh 160012 (India)****Microneedling versus topical Tazarotene 0.1% gel for the treatment of atrophic post acne scars - a randomized controlled study**

941 Name of the participant: \_\_\_\_\_

942 Name of the Investigator: Dr.Afra TP

943 Name of the Institution: PGIMER, Chandigarh

944 I, age CR. No exercising my free power of choice, hereby give my  
 945 consent to be included as a subject in the study titled “Microneedling versus topical Tazarotene  
 946 0.1 % gel for the treatment of atrophic post acne scars- a randomized controlled study.”

947 • I have been explained in a language understandable to me, the nature of the treatment, its  
 948 expected benefits and possible side effects and I am willing to undergo any necessary  
 949 investigations.

950 • I have been informed that for academic and scientific purposes, my face will be photographed  
 951 before, during and after the study.

952 • I will allow the use of my photographs for presentation and publication purposes with the  
 953 understanding that I will never be identified by name.

954 • I hereby give permission to the investigators to release the information obtained from me, as a  
 955 result of participation in this study, to the sponsors, regulatory authorities, government  
 956 agencies, and ethics committee. I understand that they may inspect my original records.

957 • I am aware that I will have to come to PGIMER, Chandigarh for follow up at least 4 times  
 958 over a period of 6 months for the proper conduct of study.

959 • I am also aware of my right to opt out of the study any time during the course trial without  
 960 having to give the reason for doing so.

961 • My signature on this form indicates that I:

962 ○ Have carefully read and understood the information provided in this form

963 ○ Have been explained the nature of this study and give my consent for inclusion in the  
 964 study.

965

966 Name and signature of patient

Name and signature of investigator

967 Date

Name and signature of witness

**ANNEXURE II****STUDY PROFORMA****Microneedling versus topical Tazarotene 0.1 % gel for the treatment of atrophic post acne scars - a randomized controlled study****Department of Dermatology, PGIMER, Chandigarh**973 **Name..... Age/Sex..... CR No.....**974 **Dermatosurgery Clinic No..... Mob No.....**

975

976 **Chief complaints:**

977

978 **Total duration:**979 **Previous treatment for acne and acne scar:**980 **H/o post treatment complication:**981 **Fitzpatrick skin type:**982 **Predominant scar type:**

983

|                                          | <b>0 week</b> | <b>1<sup>st</sup> month</b> | <b>2<sup>nd</sup> month</b> | <b>3<sup>rd</sup> month</b> | <b>6<sup>th</sup> month</b> |
|------------------------------------------|---------------|-----------------------------|-----------------------------|-----------------------------|-----------------------------|
| <b>Goodman's quantitative score</b>      |               |                             |                             |                             |                             |
| <b>Goodman's qualitative score</b>       |               |                             |                             |                             |                             |
| <b>Patient's global assessment score</b> |               |                             |                             |                             |                             |
| <b>Independent dermatologist score</b>   |               |                             |                             |                             |                             |
| <b>Adverse effect</b>                    |               |                             |                             |                             |                             |

984

985

986

|                       |           |
|-----------------------|-----------|
| <b>Investigations</b> |           |
| Hb                    |           |
| Total count           |           |
| Differential Count    | N L E M B |
| Platelets             |           |
| RFT                   |           |
| LFT                   |           |
| PT/APTT               |           |

987

988

989 **Goodman and Baron Qualitative Scarring Grading System<sup>6</sup>**

| <b>Grades of Post acne Scarring</b> | <b>Level of Disease</b> | <b>Clinical features</b>                                                                                                                                                                                                                                     |
|-------------------------------------|-------------------------|--------------------------------------------------------------------------------------------------------------------------------------------------------------------------------------------------------------------------------------------------------------|
| 1                                   | Macular                 | Erythematous, hyper/hypo pigmented flat marks. No contour changes.                                                                                                                                                                                           |
| 2                                   | Mild                    | Mild atrophy or hypertrophy scars that may not be obvious at social distances of 50 cm or greater and may be covered adequately by make up or the normal shadow of hairs.                                                                                    |
| 3                                   | Moderate                | Moderate atrophic or hypertrophic scarring that is obvious at social distances of 50 cm or greater and is not covered adequately by make up or the normal shadow of hairs; but is still able to be flattened by manual stretching of the skin (if atrophic). |
| 4                                   | Severe                  | Severe atrophic or hypertrophic scarring that is evident at social distances greater than 50 cm and is not covered easily by make up or the normal shadow of the hairs; and is not able to be flattened by manual stretching of the skin.                    |

990

991

992 **Goodmans Quantitative Global Acne Scarring Grading System<sup>7</sup>**

993

| <b>Grade or Type</b>                                                                                                                                                                                                                        | <b>Number of Lesions<br/>1 (1-10)</b> | <b>Number of Lesions<br/>2 (11-20)</b> | <b>Number of Lesions<br/>3(&gt;20)</b> |
|---------------------------------------------------------------------------------------------------------------------------------------------------------------------------------------------------------------------------------------------|---------------------------------------|----------------------------------------|----------------------------------------|
| <b>A) Milder scarring (1 point each)</b><br>Macular erythematous pigmented<br>Mildly atrophic, dish like                                                                                                                                    | 1                                     | 2                                      | 3                                      |
| <b>B) Moderate scarring (2 points each)</b><br>Moderately atrophic, dish like<br>Punched out with shallow bases small scars (<5mm)                                                                                                          | 2                                     | 4                                      | 6                                      |
| <b>C) Severe scarring (3 points each)</b><br>Punched out with deep but normal bases, small scars (<5mm)<br>Punched out with deep but abnormal bases, small scars (<5mm)<br>Linear or troughed dermal scarring<br>Deep, broad atrophic areas | 3                                     | 6                                      | 9                                      |
| <b>D) Hyperplastic</b><br>Papular scars<br>Keloidal/Hypertrophic scars                                                                                                                                                                      | 2 (Area <5mm)<br>6                    | 4 (Area 5-20 cm <sup>2</sup> )<br>12   | 6 (Area >20 cm <sup>2</sup> )<br>18    |

994

995

996

997

**ANNEXURE III****PATIENT INFORMATION SHEET**

998

999

1000

1001 **SPONSOR:** MD Thesis work.

1002

1003 **INVESTIGATOR:** Dr Afra T P

1004 **GUIDE:** Dr Tarun Narang

1005 **Co-GUIDE:** Dr Sunil Dogra

1006

1007 **Name of Participant:**

1008 **Title: Microneedling versus topical Tazarotene 0.1 % gel for the treatment of atrophic**  
1009 **post acne scars - a randomized controlled study**

1010

1011 You are invited to take part in this research study. The information in this document is meant to  
1012 help you decide whether or not to take part. Please feel free to ask if you have any queries or  
1013 concerns.

1014

1015 You are being asked to participate in this study being conducted in PGIMER Chandigarh  
1016 because you satisfy our eligibility criteria which are:

1017

1018 • Patients with grade 2 to grade 4 atrophic acne scars, classified on the basis of Goodman's  
1019 Qualitative classification

1020 • Should not have undergone any surgical and/or laser treatment for acne scars in the past 1  
1021 year.

1022 And with no contraindication for the treatment methods to be used in the study, which means  
1023 absence of any disease or condition likely to get worsened by the methods under study, which  
1024 are

1025 • Active acne

1026 • History of keloidal tendency/hypertrophic or keloidal scarring on the face due to acne

1027 • Facial scars due to reasons other than acne like varicella, trauma, burns etc

- 1028 • Collagen vascular disease, bleeding disorders
- 1029 • Any active bacterial , fungal or viral infection over face
- 1030 • Pregnant and lactating females
- 1031 • Known hypersensitivity to tazarotene
- 1032 • Age less than 18 years
- 1033 • On anticoagulant therapy or aspirin

1034

1035 You will be one of the patients we plan to recruit in this study. You will be instructed to apply  
1036 0.1% tazarotene gel over one half of the face and dermaroller will be done on other half of the  
1037 face for a total of four sittings at monthly interval.

1038 **What is the purpose of this research?**

1039 The purpose of this research is to compare the efficacy of microneedling versus topical  
1040 tazarotene 0.1% gel in the management of moderate to severe atrophic acne scars.

1041 Post acne scarring is a common complication of acne. Cosmetic appearance of the post acne  
1042 facial scarring can be improved by various methods. Topical tazarotene 0.1% gel is an effective  
1043 medical method in the management of post acne scars. Among the procedural methods  
1044 microneedling with dermaroller is a novel and a promising option. It is a minimally invasive day  
1045 care procedure for the management of atrophic acne scars.

1046 Information obtained from this study would be beneficial to other patients with atrophic post  
1047 acne scarring.

1048 **The study design**

1049 In this split-face design, the face of each patient will be randomized for microneedling on one  
1050 side and topical tazarotene gel on opposite side. Randomisation will be done using computer  
1051 generated random number table.

1052



**1053 Study Procedure**

1054 You should apply 0.1% tazarotene gel as a thin film over one half of the face once daily in the  
1055 evening daily for 3 continuous months. It should be applied approximately 15 to 20 minutes after  
1056 washing your face in the evening by placing a pea-sized amount in the palm of your hand and,  
1057 using the tip of a finger to cover the entire half of face. If you experience facial dryness you can  
1058 use a moisturizing cream during the day (entire face), but the use of any other lotions, creams,  
1059 medicated powders, or solutions on the face is prohibited. You should follow strict photo  
1060 protective measures including application of broad spectrum sunscreen of SPF 30 during the  
1061 entire study period.

1062 Dermaroller will be done on other half of the face for a total of three sittings at monthly interval.  
1063 You should come to minor operation theatre in OPD on 3 days at monthly interval for the  
1064 procedure. The procedure will be done under local anaesthesia under strict aseptic precautions.  
1065 Dermatologic examination and photographic evaluation of your face will be done during the  
1066 study.

1067 You may have to come to the hospital for examination apart from your scheduled visits, if  
1068 required.

**1069 Women of childbearing potential**

1070 You must not participate if you are pregnant, breastfeeding a child, or if you are of childbearing  
1071 potential and not practicing two forms of effective methods of contraception. These forms could  
1072 be either an oral contraceptive pill plus a condom or diaphragm; or two barrier methods (e.g. a  
1073 condom and diaphragm). You may also consider participating, if you are surgically sterile or  
1074 postmenopausal. If you become pregnant during the study, your unborn child may be exposed to  
1075 risks.

**1076 Possible benefits to you**

1077 You will be getting treatment benefit along with dermaroller sessions.

1078

1079

1080 **Possible risks to you**

1081 Common adverse effects of topical tazarotene are erythema, burning/stinging, itching, and  
1082 dryness.

1083 Side effects that have been reported with dermaroller include procedural pain, transient post  
1084 procedure erythema, bruising and swelling, PIH and tram-track scarring. Most of these were mild  
1085 in nature. PIH was mainly due to inadequate sun protection.

1086 **Compensation**

1087 You will not receive any compensation for the inconvenience and travel.

1088 **Possible benefits to other people**

1089 The results of the research may provide benefits to the society in terms of advancement of  
1090 medical knowledge and/or therapeutic benefit to future patients.

1091 **The alternatives you have**

1092 If you do not wish to participate, you have the alternative of getting the standard treatment for  
1093 your condition.

1094 **Cost to the participant**

1095 You will be required to pay for the medications and lab tests. You will not be paid to participate  
1096 in this research study.

1097 **What should you do in case of injury or a medical problem during this research study?**

1098 Your safety is the prime concern of the research. If you are injured or have a medical problem as  
1099 a result of being in this study, you should contact the person listed at the end of the consent form.  
1100 You will be provided the required care/treatment.

1101 You will be entitled to your legal rights besides this.

1102 **Confidentiality of the information obtained from you**

1103 The identity status of the participants shall be kept confidential. By signing this document, you  
1104 will be allowing the research team investigators, other study personnel, institutional ethics

1105 committee and any person or agency required by law like the Drug Controller General of India to  
1106 view your data, if required. The information from this study, if published in scientific journals or  
1107 presented at scientific meetings, will not reveal your identity.

1108 **How will your decision to not participate in the study affect you?**

1109 Your decision not to participate in this research study will not affect your medical care or your  
1110 relationship with the investigator or the institution. Your doctor will still take care of you and  
1111 you will not lose any benefits to which you are entitled.

1112 **Can you decide to stop participating in the study once you start?**

1113 You are free to withdraw your consent and to stop participating in this research study at any  
1114 time. It will have no effect on your treatment.

1115 **Can the investigator take you off the study?**

1116 You may be taken off the study without your consent if you do not follow instructions of the  
1117 investigators or the research team or if the investigator thinks that further participation may cause  
1118 you harm.

1119 **Right to new information**

1120 If the research team gets any new information during this research study that may affect your  
1121 decision to continue participating in the study, or may raise some doubts, you will be told about  
1122 that.

1123 **Contact person**

1124 For further information/ questions, you can contact us at the following address:

1125 Dr. Afra T P

1126 Phone No- 8427652806

1127 Department of Dermatology, Venereology and Leprology,

1128 PGIMER, Chandigarh

1129
