# Supplementary material
Source: PubMed Central journal article supplement (PMC6439800)
Supplement: jamafacialplastsurg-21-125-s003.pdf [file jamafacialplastsurg-21-125-s003.pdf]

## **Data Sharing Statement**

### **Data**

**Data available:** Yes

**Data types:** Deidentified participant data

**How to access data:** afrazain88@gmail.com

**When available:** With publication

### **Supporting Documents**

**Document types:** None

### **Additional Information**

**Who can access the data:** researchers whose proposed use of the data has been approved

**Types of analyses:** for any purpose

**Mechanisms of data availability:** with a signed data access agreement
